# Supplementary material
Source: MDPI journal article supplement (https://www.mdpi.com/1999-4907/6/9/3256)
Supplement: s1 [file s1]

Supplementary material

Height analysis

**Table S1**. Parameter estimates and error statistics for the stand height increment models.

|  | ***ih*g** |  |  |  |  | ***ih*g dom** |  |  |  |
| --- | --- | --- | --- | --- | --- | --- | --- | --- | --- |
| **Fixed parameters** | **Estimate** | **SE** | ***t*-Value** | ***p* > |t|** |  | **Estimate** | **SE** | ***t*-Value** | ***p* > |t|** |
| **Intercept** | 0.2535 | 0.0410 | 6.1790 | 0.0002 |  | 0.2517 | 0.0425 | 5.9176 | 0.0002 |
| **Treatment ST** | −0.0384 | 0.0524 | −0.7316 | 0.4830 |  | −0.0156 | 0.0544 | −0.2866 | 0.7809 |
| **Treatment VT** | −0.0708 | 0.0524 | −1.3490 | 0.2103 |  | −0.0330 | 0.0544 | −0.6063 | 0.5592 |
| **Aspect SW** | −0.0222 | 0.0437 | −0.5093 | 0.6227 |  | −0.0328 | 0.0453 | −0.7252 | 0.4868 |
|  | St. Dev. |  |  |  |  | St. Dev. |  |  |  |
| **Random intercept** | 1.5852 |  |  |  |  | 1.7626 |  |  |  |
| **Residual error** | 0.0829 |  |  |  |  | 0.0860 |  |  |  |
| ***R*2** | 0.1592 |  |  |  |  | 0.0751 |  |  |  |
| **RMSE** | 0.0710 |  |  |  |  | 0.0736 |  |  |  |

**Figure S1.** Height growth in response to thinning according to aspect.

Residuals of the individual tree-level model

**Figure S2.** Plot of residuals vs. expected annual basal area increment achieved with the individual tree-level model (Equation 3).
